# Supplementary material for: Reversible multi-control fluorescent switch and molecular logic gate based on selective recognition of Fe3+ and its application to multiplex detection
Source: Royal Society of Chemistry journal article supplement (doi:10.1039/c4ay01656d), 2014-01-01
Supplement: c4ay01656d1.pdf [file c4ay01656d1.pdf]

## Supplementary Information for

### Reversible multi-control fluorescent switch and molecular logic gate based on selective recognition of Fe<sup>3+</sup> and its application to multiplex detection

Yan Liang, Weizhou Liu, Hui Zhang, Fang Chen \*

*College of Chemistry and Chemical Engineering, Huazhong University of Science and Technology, Wuhan 430074, China*

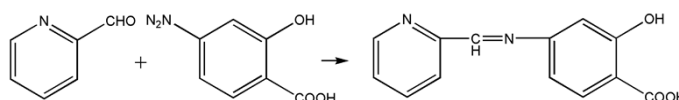

Scheme S1: Scheme 1-Synthesis of PA

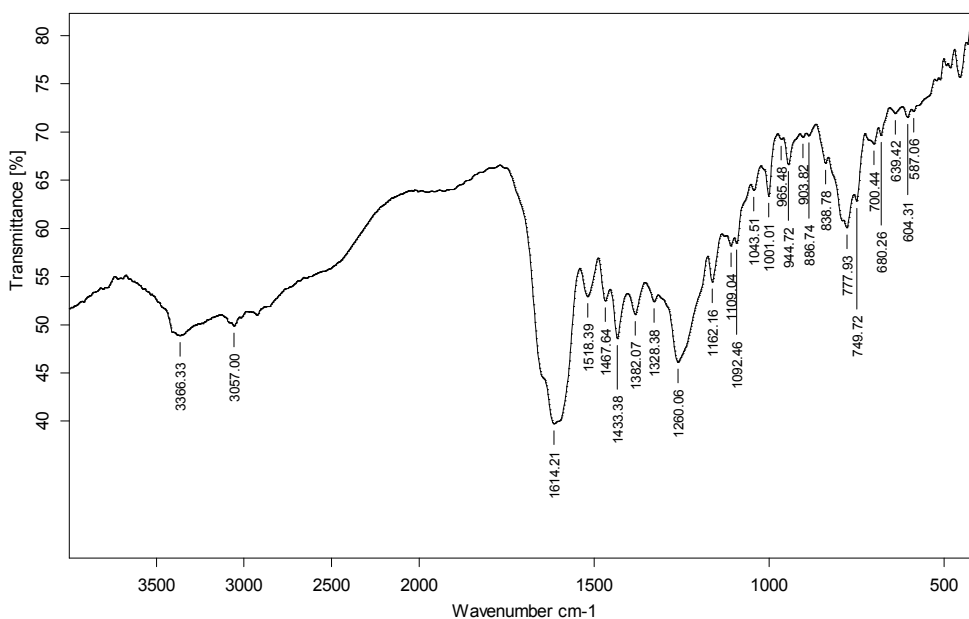

Figure S1: FT-IR of chemical PA

FT-IR(KBr): C=N- 1614 cm<sup>-1</sup>, OH- 3366 cm<sup>-1</sup>, -C=C- 1467.64cm<sup>-1</sup>.

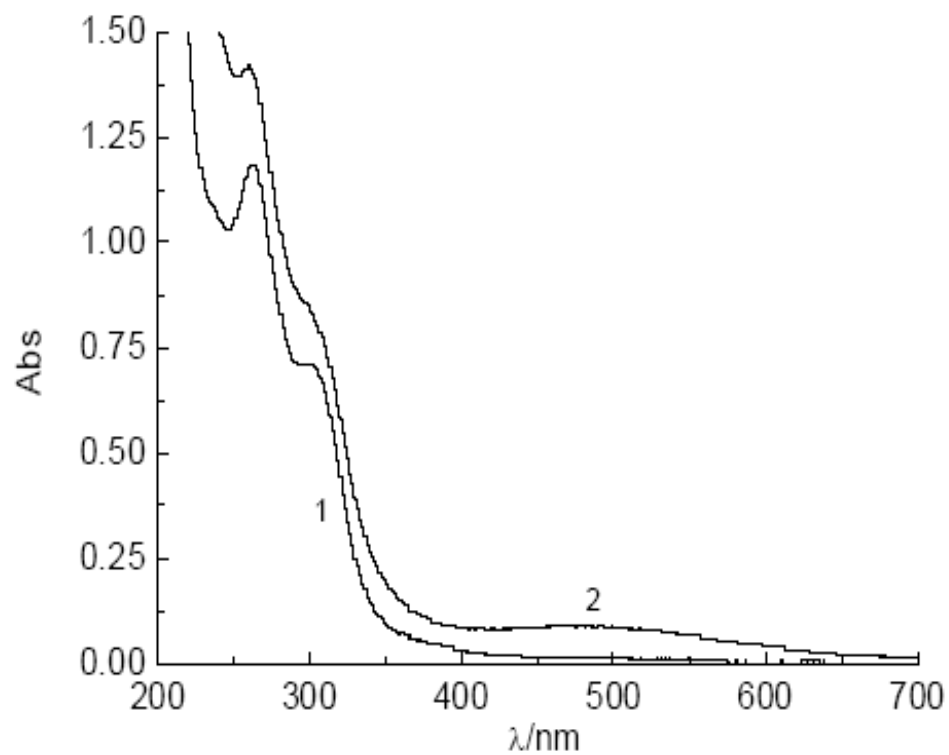

Figure S2 UV-Vis spectra of PA (Fig.S2) in the (1)absence and (2)presence of  $\text{Fe}^{3+}$ .
